# Supplementary material for: Gene loci associated with insulin secretion in islets from nondiabetic mice
Source: JCI journal article supplement (doi:10.1172/jci129143), 2019-07-25
Supplement: sd5 [file 5]

| <b>Mouse Trait</b>                                                                                                                                                                                                                                                                                                                                                                                                                                                                                                                                               | <b>MPO</b>                                | <b>HPO</b>                                  |
|------------------------------------------------------------------------------------------------------------------------------------------------------------------------------------------------------------------------------------------------------------------------------------------------------------------------------------------------------------------------------------------------------------------------------------------------------------------------------------------------------------------------------------------------------------------|-------------------------------------------|---------------------------------------------|
| <i>Insulin secretion in response to 3.3mM glucose</i><br><i>Insulin secretion in response to 8.3mM glucose</i><br><i>Insulin secretion in response to 16.7mM glucose</i><br><i>Insulin secretion in response to amino acids and 8.3mM glucose</i><br><i>Insulin secretion in response to 100nM GLP1 and 8.3mM glucose</i><br><i>Insulin secretion in response to 40mM KCL and 3.3mM glucose</i><br><i>Insulin secretion in response to 0.5mM palmitic acid and 16.7mM glucose</i><br><i>Islet insulin content</i><br><i>AUC<sub>insulin</sub> during an oGTT</i> | Abnormal insulin secretion                | Abnormal insulin level                      |
| <i>Glucagon secretion in response to 40mM KCL and 3.3mM glucose</i><br><i>Islet glucagon content</i>                                                                                                                                                                                                                                                                                                                                                                                                                                                             | Abnormal glucagon secretion               | Abnormal glucagon level                     |
| <i>Number of islets harvested per mouse</i>                                                                                                                                                                                                                                                                                                                                                                                                                                                                                                                      | Abnormal pancreatic islet number          | Abnormality of the pancreatic islet cells   |
| <i>Fasting plasma glucose at 6 wk</i><br><i>Fasting plasma glucose at 10 wk</i><br><i>Fasting plasma glucose at 14 wk</i><br><i>Fasting plasma glucose at sacrifice</i>                                                                                                                                                                                                                                                                                                                                                                                          | Abnormal fasted circulating glucose level | Abnormality of blood glucose concentration* |
| <i>Fasting plasma insulin at 6 wk</i><br><i>Fasting plasma insulin at 10 wk</i><br><i>Fasting plasma insulin at 14 wk</i><br><i>Fasting plasma insulin at sacrifice</i>                                                                                                                                                                                                                                                                                                                                                                                          | Abnormal circulating insulin level        | Abnormal circulating insulin level          |
| <i>Fasting plasma triglyceride at 6 wk</i><br><i>Fasting plasma triglyceride at 10 wk</i><br><i>Fasting plasma triglyceride at 14 wk</i><br><i>Fasting plasma triglyceride at sacrifice</i>                                                                                                                                                                                                                                                                                                                                                                      | Abnormal circulating triglyceride level   | Abnormality of lipid metabolism*            |
| <i>Body weight at 6 wk</i><br><i>Body weight at 10 wk</i><br><i>Body weight at 14 wk</i><br><i>Body weight at sacrifice</i>                                                                                                                                                                                                                                                                                                                                                                                                                                      | Abnormal body weight                      | Abnormality of body weight                  |
| <i>HOMA-IR</i>                                                                                                                                                                                                                                                                                                                                                                                                                                                                                                                                                   | Insulin resistance                        | Insulin resistance                          |
| <i>HOMA-B</i>                                                                                                                                                                                                                                                                                                                                                                                                                                                                                                                                                    | Abnormal pancreatic beta cell physiology  | Beta-cell dysfunction                       |
| <i>AUC<sub>glucose</sub> during an oGTT</i>                                                                                                                                                                                                                                                                                                                                                                                                                                                                                                                      | Abnormal glucose tolerance                | Abnormal oral glucose tolerance             |
| <i>Avg. food consumption/mouse/day</i>                                                                                                                                                                                                                                                                                                                                                                                                                                                                                                                           | Abnormal food intake                      | Abnormal eating behavior*                   |
